# Supplementary material
Source: publisher figshare collection journal article supplement (https://acs.figshare.com/ndownloader/files/4395316)
Supplement: Supplementary file 1 [file 4395316]

## Supporting Information

### **A general route towards patterning of graphene oxide by a combination of wettability modulation and spin-coating**

Yunlong Guo,<sup>1</sup> Chong-an Di,<sup>1</sup> Hongtao Liu, Jian Zheng, Lei Zhang, Gui Yu\* and Yunqi Liu\*

Beijing National Laboratory for Molecular Sciences, Key Laboratory of Organic Solids, Institute of Chemistry, Chinese Academy of Sciences, Beijing 100190 (P. R. China)

<sup>1</sup> The authors contributed equally to this work.

\* To whom correspondence should be addressed. E-mail: liuyq@iccas.ac.cn, yugui@iccas.ac.cn.

## **1. The spin-rate effects on surface uniformity and coverage of *GOs*.**

The uniformity in a sample and between samples is almost the same, if we chose same *GOs* concentration,  $O_3$  treating time and spin coating speed. When the spin-rate is low, the substrate needs more time to dry its' surface and the uniformity of the *GOs* is poor, especially at the edge of the substrate (see Figure S1a). And the uniform area is increasing with the spin rate increasing, even in a shorter spin-coating time (see Figure S1b). Further, AFM measurements were performed on different dry substrates to see the relationship between spin rates and the coverage (see Figure S1c and S1d). The coverage was decreased as the spin rate increasing. When the spin rate  $> 3000$  r/m, the film uniformity and coverage are at a good level.

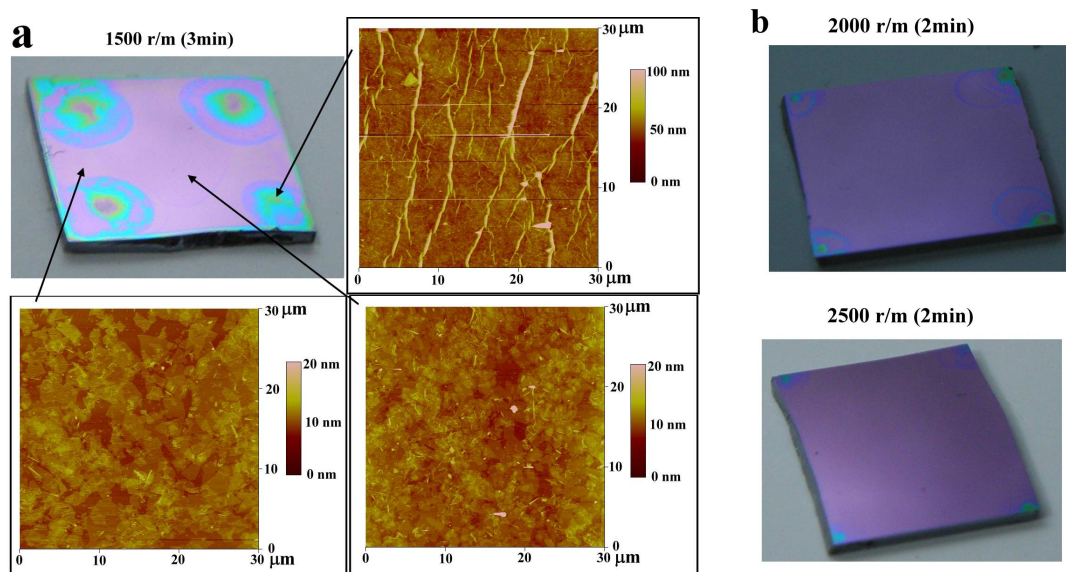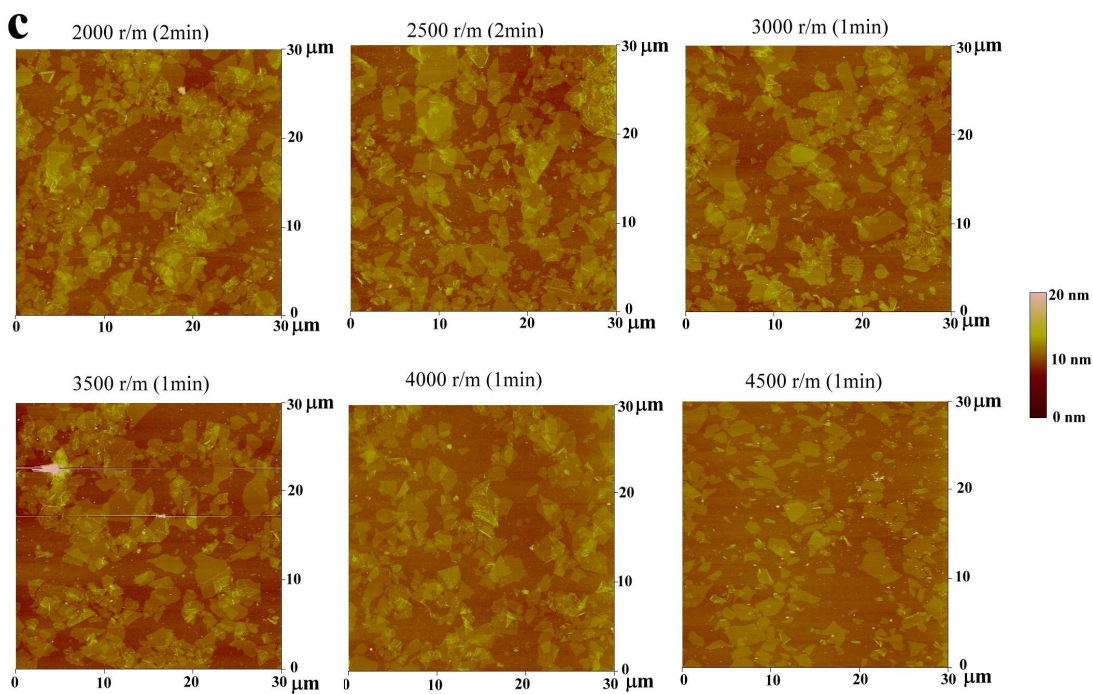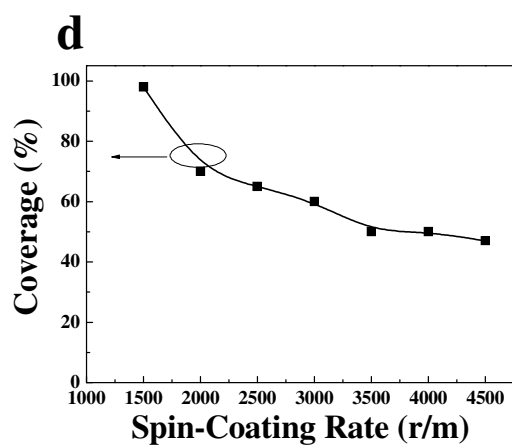

**Figure S1.** (a) Pictures of bad uniformity substrate with spin-coating rate 1500 r/m (3 min). *AFM* images are highly different in different areas. (b) Pictures of SiO<sub>2</sub> substrates with spin-coating rate of 2000 r/m (2 min) and 2500 r/m (2 min). (c) *AFM* images of *GOs* on substrates with different spin-coating rate. (d) Relationship between spin-coating rate and coverage.

**2. The coverage of the *GOs* on the *UVO* treated (about 180 s) SiO<sub>2</sub> (*PFS* modified) substrate**

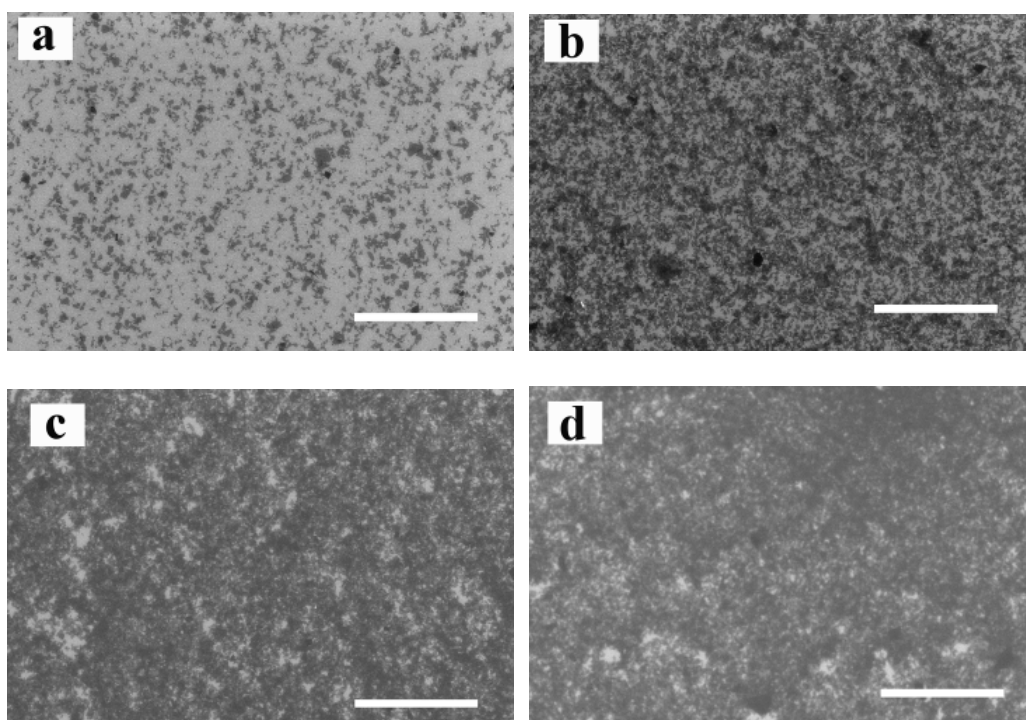

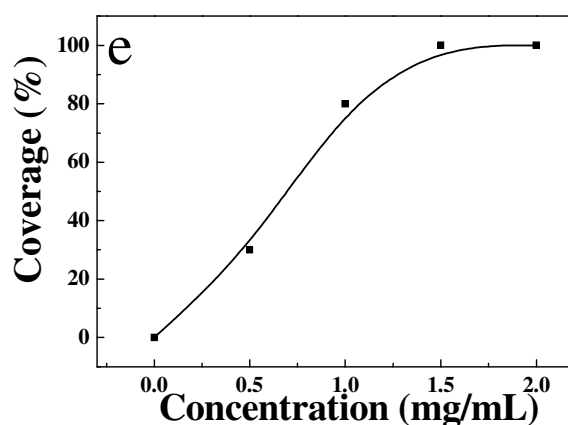

**Figure S2.** SEM images of different concentrations *GO* solution spin-coating on the *UVO* treated (about 180 s)  $\text{SiO}_2$  (*PFS* modified) substrate: (a) 0.5 mg/mL, (b) 1.0 mg/mL, (c) 1.5 mg/mL, (d) 2.0 mg/mL, and (e) the corresponded *GOs* coverage plot. The scale bar is 20  $\mu\text{m}$ .

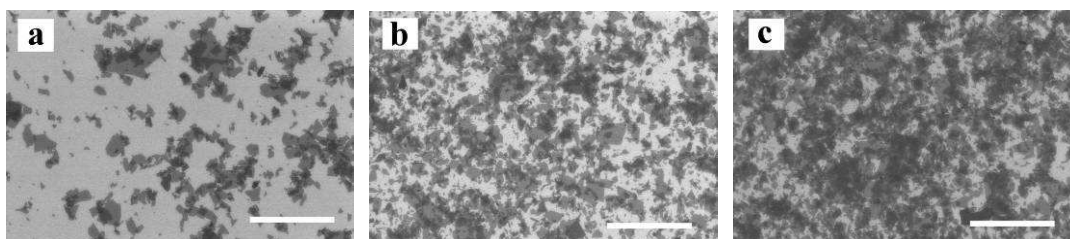

**Figure S3.** SEM images of *GOs* coverage on the *UVO* treated (about 180 s)  $\text{SiO}_2$  (*PFS* modified) substrate with different spin-coating cycles. (a), 1 time; (b), 2 times and (c), 3 times. The scale bar is 20  $\mu\text{m}$ .

### 3. The patterned results of *GO* sheets on *PFS* treated $\text{SiO}_2$ surface

Different shapes can be formed by the *GO* sheets though *PFS* surface patterning.

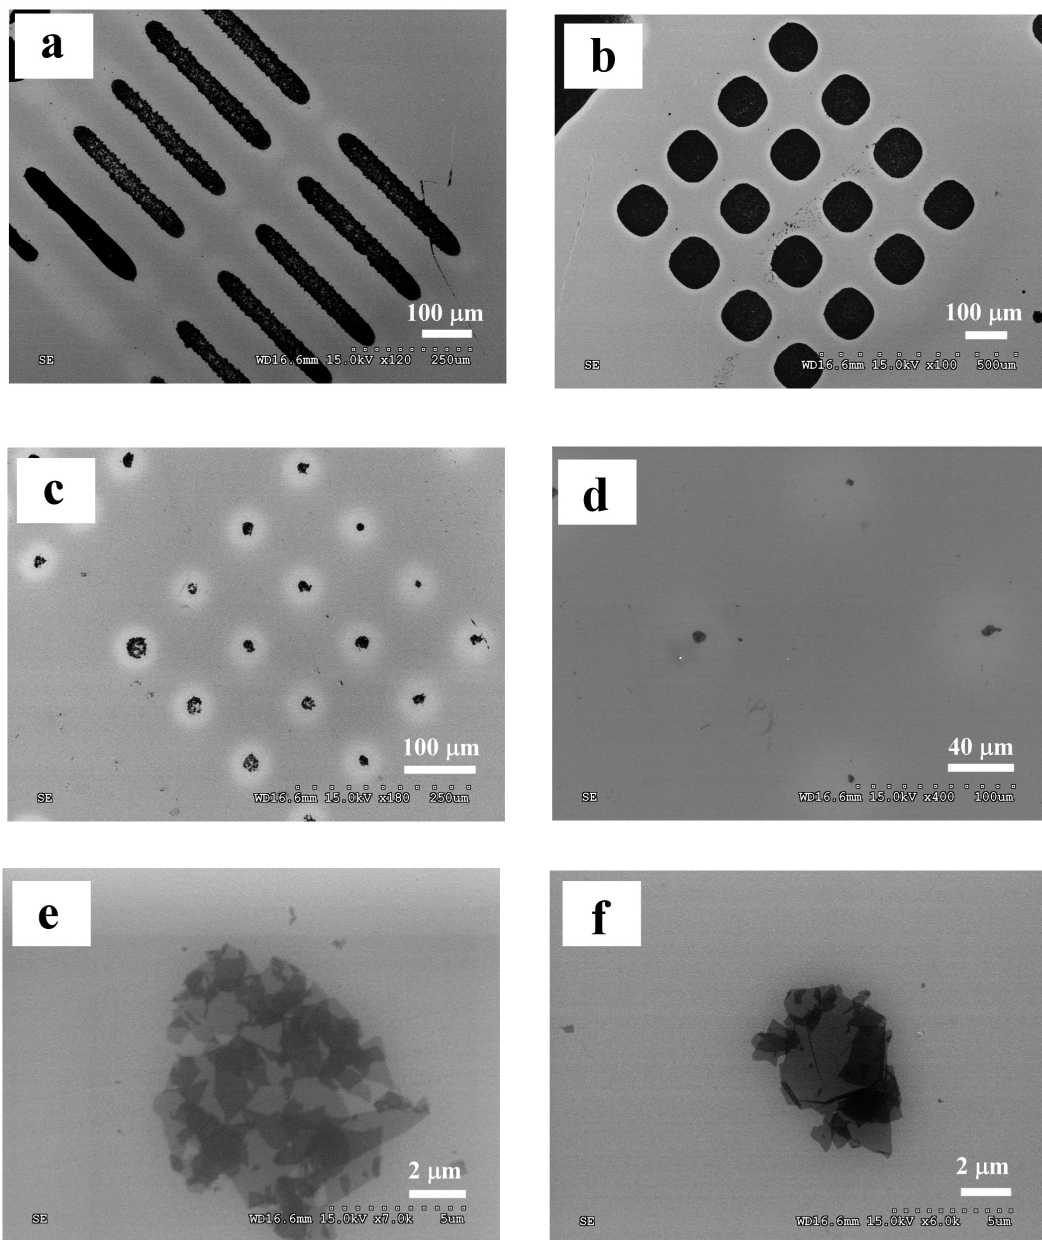

**Figure S4.** SEM images of patterned *GOs* (2.0 mg/mL) on patterning *PFS* surface.

(a)–(f) are the different shapes and scales of patterned *GOs*.

#### 4. The *GO* sheet coverage on *Au* surface

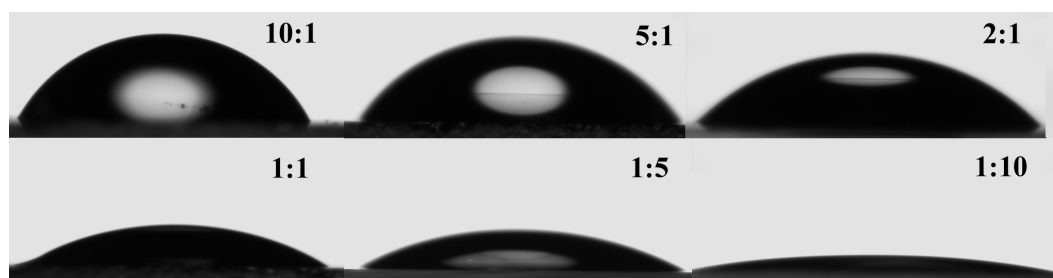

**Figure S5.** The contact angles on *Au* surface based on different ratios of water: ethanol.

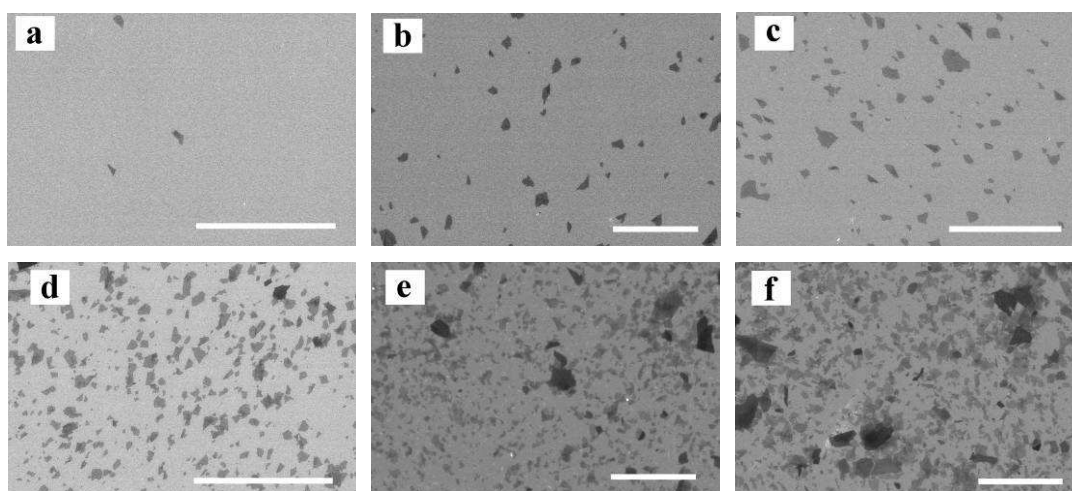

**Figure S6.** SEM images of the *GOs* coverage on *Au* surface. *GO* solution (~0.7 mg/mL) based on different water/ethanol ratio solvents: (a), 5:1; (b), 2:1; (c), 1:1; (d), 1:2; (e), 1:5; and (f), 1:10. The scale bar is 20 μm.

## 5. Organic field-effect transistors

The mobility of the *OFETs* in the saturation region was extracted from the following equation:

$$I_{DS} = \frac{W}{2L} \mu C_i (V_{GS} - V_{th})^2 \quad (1)$$

where  $I_{DS}$  is the drain electrode for collecting current,  $C_i$  is the capacitance per unit area of the gate dielectric layer,  $V_{th}$  is the threshold voltage, and  $L$  and  $W$  are the channel length and width, respectively. The  $V_{th}$  of the device was determined by extrapolating the  $(|I_{DS,sat}|)^{1/2}$  vs.  $V_{GS}$  plot to  $I_{DS} = 0$ .

Aluminum, which is considered as a bad surface for *GOs* deposition, can also be covered with *GOs* by our method.

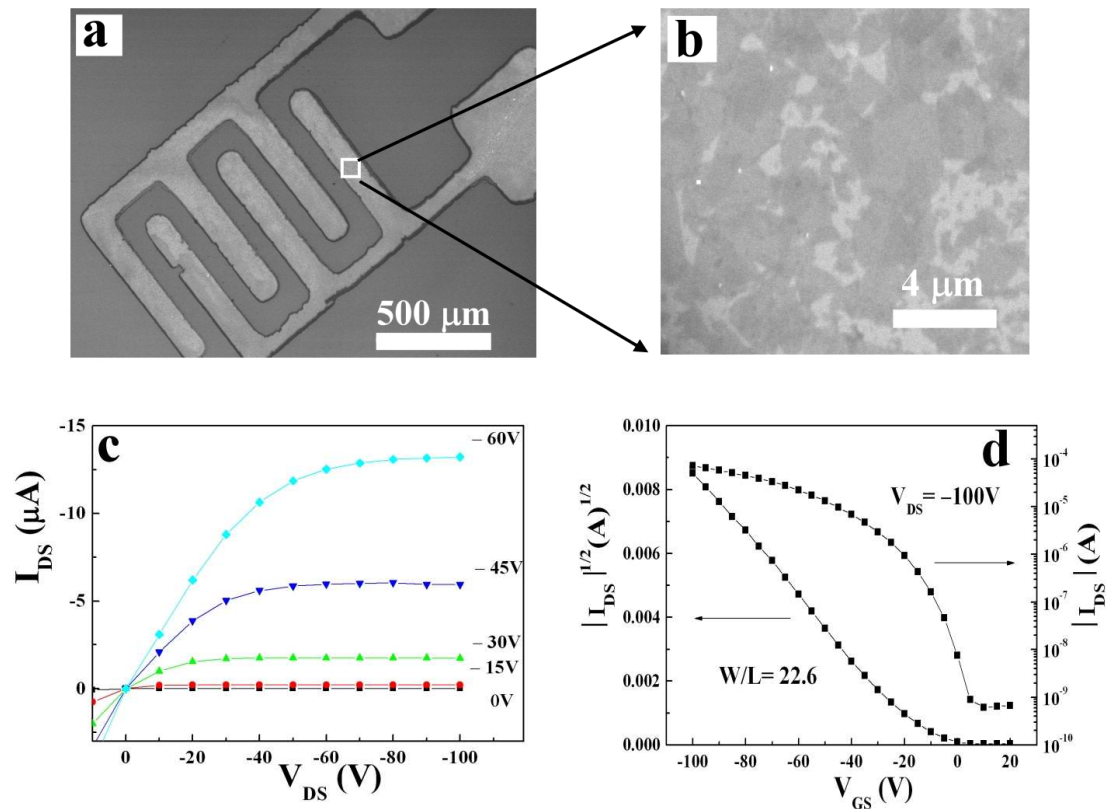



**Figure S7.** SEM images and characteristics of field-effect transistors. (a) SEM images of the GOs (1.5 mg/mL) covering on the Al surface. (b) Enlarge image of the contacted area. The pentacene transistors based on theses reduced electrodes (reduced at 220 °C). (c) Output curves. (d) Transfer curves.

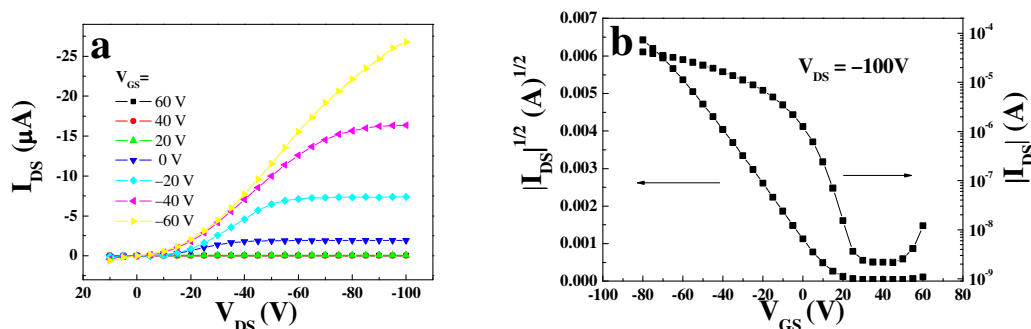

**Figure S8.**  $I$ - $V$  characteristics of field-effect transistors. The transistors are based on pure RGOs (reduced at 220 °C) as electrodes and pentacene as semiconductor. (a) Output curves. (b) Transfer curves.

## 6. *GOs* on the *PET* surface

### 6.1 Patterning of *GOs* on *PET* surface

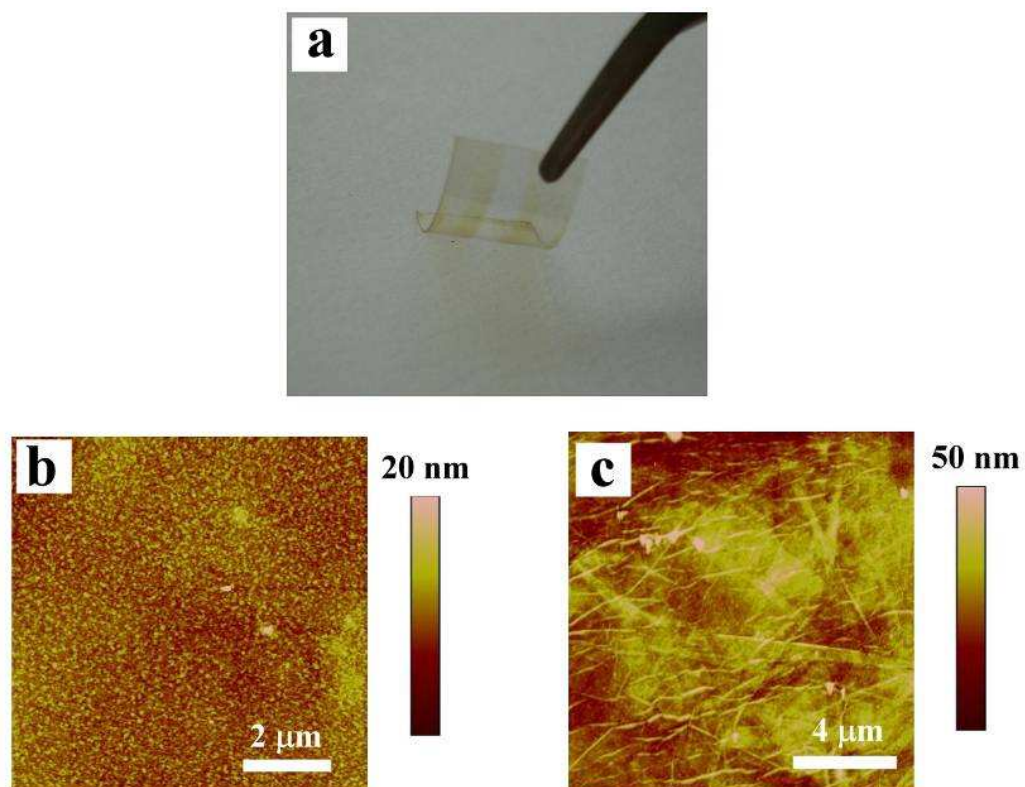

**Figure S9.** (a) Photograph of *PET* with patterned *GOs*. The corresponding *AFM* images on (b) dewetting area, and (c) wetting areas.
